# Supplementary material for: Interaction of DBC1 with polyoma small T antigen promotes its degradation and negatively regulates tumorigenesis
Source: PubMed Central journal article supplement — J Biol Chem. 2021 Dec 16;298(2):101496. doi: 10.1016/j.jbc.2021.101496 (PMC8784333; doi:10.1016/j.jbc.2021.101496), 2021-12-16
Supplement: mmc1.pdf [file mmc1.pdf]

### **Supplementary Table 1:**

Table showing proteins, including DBC1 (CCAR2), identified by 3 or more gene-unique peptides following LC-MS-MS analysis of PyST immunoprecipitated complex.

| <b>S.No.</b> | <b>Protein Description</b>                                                        | <b>Gene Symbol</b>  | <b>Unique Seqs.</b> | <b>Sequence Coverage</b> |
|--------------|-----------------------------------------------------------------------------------|---------------------|---------------------|--------------------------|
| 1            | Nuclear pore complex protein Nup153                                               | NUP153              | 24                  | 22.17                    |
| 2            | Nuclear pore complex protein Nup50                                                | NUP50               | 14                  | 38.89                    |
| 3            | Kinesin-like protein KIFC1                                                        | KIFC1               | 11                  | 21.1                     |
| 4            | Importin subunit alpha-1                                                          | KPNA2               | 10                  | 22.68                    |
| 5            | Serine/threonine-protein phosphatase 2A 65 kDa regulatory subunit A alpha isoform | PPP2R1A             | 9                   | 21.39                    |
| 6            | Importin subunit beta-1                                                           | KPNB1               | 7                   | 10.5                     |
| 7            | Transcriptional coactivator YAP1                                                  | YAP1                | 7                   | 25.99                    |
| 8            | Phosphatidate phosphatase LPIN1                                                   | LPIN1               | 7                   | 13.6                     |
| 9            | E3 SUMO-protein ligase RanBP2                                                     | RANBP2              | 6                   | 4.44                     |
| 10           | <b>Cell cycle and apoptosis regulator protein 2</b>                               | <b>CCAR2 (DBC1)</b> | <b>6</b>            | <b>11.7</b>              |
| 11           | Kinesin-like protein KIF18B                                                       | KIF18B              | 6                   | 7.18                     |
| 12           | Serine/threonine-protein phosphatase 2A 65 kDa regulatory subunit A beta isoform  | PPP2R1B             | 5                   | 9.32                     |
| 13           | WW domain-containing transcription regulator protein 1                            | WWTR1               | 5                   | 21.5                     |
| 14           | WD repeat-containing protein 25                                                   | WDR25               | 4                   | 9.74                     |
| 15           | Cell division cycle-associated protein 2                                          | CDCA2               | 4                   | 7.62                     |
| 16           | Forkhead box protein P4                                                           | FOXP4               | 4                   | 10.59                    |
| 17           | mRNA cap guanine-N7 methyltransferase                                             | RNMT                | 4                   | 10.71                    |
| 18           | Cullin-5                                                                          | CUL5                | 4                   | 5.64                     |
| 19           | Nuclear mitotic apparatus protein 1                                               | NUMA1               | 4                   | 3.22                     |
| 20           | Ran GTPase-activating protein 1                                                   | RANGAP1             | 3                   | 6.3                      |
| 21           | Phosphatidate phosphatase LPIN2                                                   | LPIN2               | 3                   | 4.46                     |

**Supplementary Table 2:**

Unique peptide sequences of DBC1 that were detected in mass spectrometric analysis.

| <b>Peptide sequence</b>               | <b>Variable Modifications</b> | <b>Exptal. mz</b> | <b>Chrg.</b> | <b>Peptide score</b> | <b>Start Pos.</b> | <b>End Pos.</b> |
|---------------------------------------|-------------------------------|-------------------|--------------|----------------------|-------------------|-----------------|
| VQTLSNQPLLK                           | None                          | 620.86753         | 2            | 47.83                | 113               | 123             |
| SPAPLLHVAALGQK                        | None                          | 500.2963          | 3            | 42.09                | 124               | 138             |
| FAEFQYLQPGPPR                         | None                          | 775.39254         | 2            | 28.2                 | 405               | 417             |
| ADSWVEKEEPAPSN                        | None                          | 779.85608         | 2            | 55.12                | 910               | 923             |
| EAAPDAGAEPITADS<br>DPAYSSK            | None                          | 1081.99344        | 2            | 113.14               | 288               | 309             |
| AAEAAPPTQEAQGETE<br>PTEQAPDALEQAADTSR | None                          | 1127.51892        | 3            | 109.33               | 447               | 479             |
